# Supplementary material for: Porous magnetic carbon sheets from biomass as an adsorbent for the fast removal of organic pollutants from aqueous solution
Source: Royal Society of Chemistry journal article supplement (doi:10.1039/c3ta14604a), 2014-01-01
Supplement: c3ta14604a.pdf [file c3ta14604a.pdf]

## **Supporting Information for**

### **Porous magnetic carbon sheets from biomass as super adsorbents for fast removal of organic pollutants from aqueous solution**

Shouwei Zhang<sup>a,b</sup>, Meiyi Zeng<sup>b</sup>, Jiaying Li<sup>a\*</sup>, Jie Li<sup>a</sup>, Jinzhang Xu<sup>b</sup>, Xiangke Wang<sup>a,b\*</sup>

<sup>a</sup>Key Laboratory of Novel Thin Film Solar Cells, Institute of Plasma Physics, Chinese Academy of Sciences, P.O. Box 1126, Hefei, 230031, P. R. China.

<sup>b</sup>School of Materials Science and Engineering, Hefei University of Technology, 230031, Hefei, P. R. China

<sup>c</sup> School for Radiological and Interdisciplinary Sciences, Soochow University, Suzhou 215123, P.R. China

E-mail: [lijx@ipp.ac.cn](mailto:lijx@ipp.ac.cn) (J. Li), [xkwang@ipp.ac.cn](mailto:xkwang@ipp.ac.cn) or [xkwang@suda.edu.cn](mailto:xkwang@suda.edu.cn) (X. Wang)

Fax: +86-551-65591310; Tel: +86-551-65592788

## **Kinetic Model.**

Pseudo-First- and Pseudo-Second-Order Model.

The linear form of pseudo-first-order rate equation is

$$\log(q_e - q_t) = \log q_e - \frac{k_1}{2.303} t$$

where  $q_e$  and  $q_t$  are the amounts of dye adsorbed (mg/g) at equilibrium and time  $t$  (min), respectively;  $k_1$  is the rate constant ( $\text{min}^{-1}$ ) of the pseudo first-order kinetic model.

A linear form of pseudo second-order kinetic model is express

$$\frac{t}{q_t} = \frac{1}{k_2 q_e^2} + \frac{t}{q_e}$$

where  $k_2$  is the rate constant( $\text{g}/(\text{mg} \cdot \text{min})$ ) of pseudo second-order kinetic model for adsorption.

### **Isotherm Model.**

The Langmuir isotherm is often applicable to a homogeneous adsorption surface with all the adsorption sites having equal adsorbate affinity and is represented by the following equation:

$$q_e = \frac{q_m b C_e}{1 + b C_e}$$

while the Freundlich isotherm model assumes heterogeneity of adsorption surfaces, expressed by the following equation:

$$q_e = K_F (C_e)^n$$

where  $q_e$  and  $C_e$  are the amount of organic pollutants adsorbed per unit weight of adsorbent (mg/g) and the equilibrium concentration (mg/L), respectively;  $b$  is the constant related to the free energy of adsorption (L/mg), and  $q_m$  is the maximum adsorption capacity;  $K_F$  is the Freundlich constant indicative of the relative adsorption capacity of the adsorbent (mg/g), and  $(n)$  is the adsorption intensity.

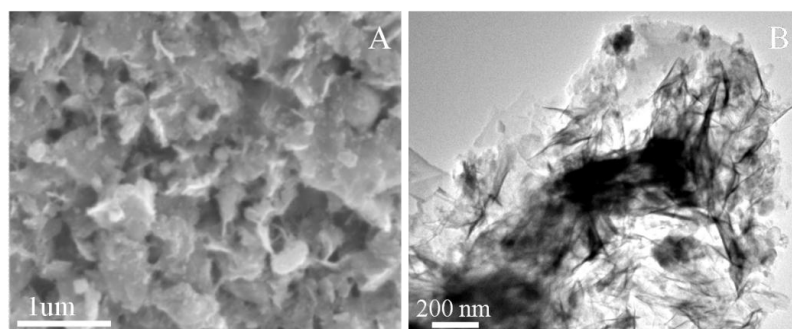

Fig. S1. SEM (A) and TEM (B) images of the PMCS after eight adsorption cycle.

We can see that the morphologies of PMCS were slight change, but a more complete layered structure and pore structures remains substantially after eight adsorption cycle. Therefore, we speculate that sheet structure of PMCS is stable under our experiment condition.

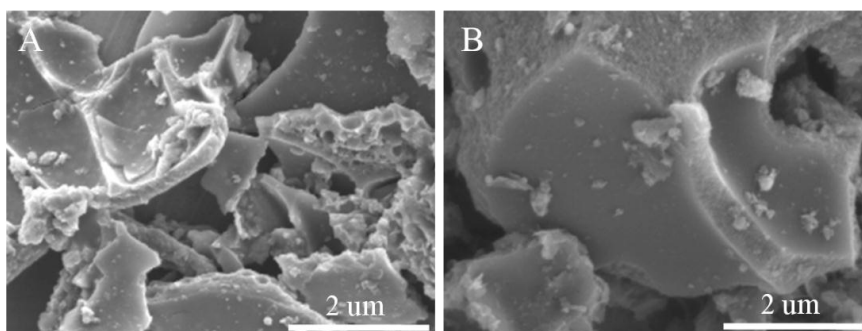

Fig. S2. The SEM images of the samples in the presence of  $\text{Al}(\text{NO}_3)_3$  (A) and  $\text{Fe}(\text{NO}_3)_3$  (B).

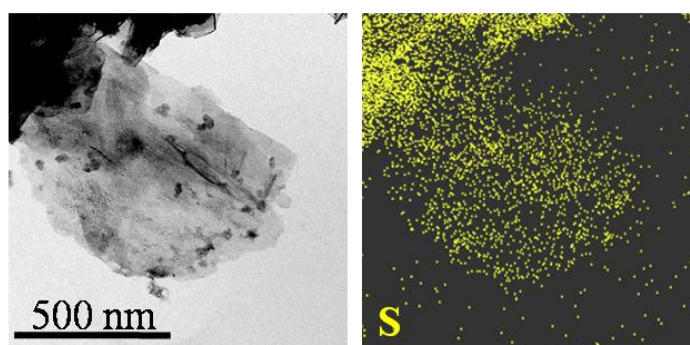

Fig S3. The elemental S mapping on the PMCS after adsorption MB.

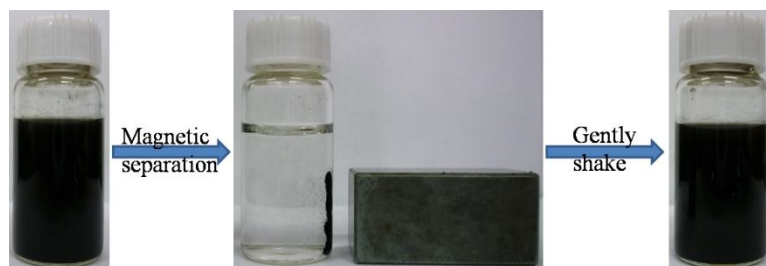

Fig. S4 Photos of magnetic separation and dispersion of PMCS

From Fig. S4, PMCS dispersed in water could be rapidly separated by a magnet and then re-dispersed easily with a slight shake once the magnet was removed. (See Fig. S4) It suggested that PMCS possess excellent magnetic properties and are also highly water-dispersive, which was an advantage for their applications.

Table S1. Kinetic parameters of pseudo first-order and second-order adsorption kinetic models and weber-morris model for MB, MO and CV sorption on PMCS.

|     |                    | pseudo-first-order model  |                    |       | pseudo-second-order model |                    |       | Intra-particle diffusion             |            |       |
|-----|--------------------|---------------------------|--------------------|-------|---------------------------|--------------------|-------|--------------------------------------|------------|-------|
| dye | $q_{e,exp}$ (mg/g) | $k_1$ (min) <sup>-1</sup> | $q_{e,cal}$ (mg/g) | $R^2$ | $k_1$ (min) <sup>-1</sup> | $q_{e,cal}$ (mg/g) | $R^2$ | $K_i$ (min/(mg/min <sup>1/2</sup> )) | $C$ (mg/g) | $R^2$ |
| MB  | 765                | 0.1431                    | 658.61             | 0.945 | 0.0072                    | 773.65             | 0.999 | 2.8959                               | 730.91     | 0.957 |
| MO  | 696                | 0.1393                    | 531.38             | 0.968 | 0.0062                    | 689.74             | 0.998 | 1.1191                               | 685.81     | 0.943 |
| MV  | 790                | 0.1454                    | 691.35             | 0.977 | 0.0068                    | 806.45             | 0.999 | 2.9467                               | 764.33     | 0.982 |

To further understand the characteristics of the adsorption process, kinetic models such as pseudo-first-order and pseudo-second-order were exploited to analyze the experimental data. The calculated kinetics parameters for the removal of dye on

PMCS were listed in Table S1. It was found that the  $R^2$  values of the pseudo-second-order model are much higher than those of pseudo-first-order model, the calculated  $q_{e,cal}$  values of the pseudo-second-order model are close to experimental  $q_{e,exp}$ . Hence, the pseudo-second-order kinetic model is more suitable for describe the adsorption behavior of MB, CV and MB over PMCS.

Table S2. Comparison of the adsorption capacities of MB, MO and CV onto various adsorbents.

| Dyes | Adsorbents                                    | Adsorption capacity (mg/g) | Ref.      |
|------|-----------------------------------------------|----------------------------|-----------|
| MB   | anaerobic granular sludge                     | 212                        | 1         |
|      | graphene/magnetite composite                  | 43.08                      | 2         |
|      | CNTs-A                                        | 400                        | 3         |
|      | copper silicate hollow spheres                | 162                        | 4         |
|      | Metal silicate nanotubes                      | 400                        | 5         |
|      | PMCS                                          | 1615.9                     | This work |
| MO   | hyper-cross-linked polymeric                  | 70                         | 6         |
|      | silkworm exuviae                              | 87                         | 7         |
|      | chitosan/Fe <sub>2</sub> O <sub>3</sub> /CNTs | 66                         | 8         |
|      | CNTs-A                                        | 149                        | 3         |
|      | PMCS                                          | 1062.4                     | This work |
| CV   | opal-dye sludge                               | 101.13                     | 9         |
|      | Grapefruit peel                               | 254.16                     | 10        |
|      | Magnetic nanocomposite                        | 81.7                       | 11        |
|      | Sulfuric acid activated carbons               | 85.84                      | 12        |
|      | PMCS                                          | 1728.3                     | This work |

## References

1. F. F. Liu, S. X. Teng, R. H. Song and S. G. Wang, *Desalination* 2010, **263**, 11-17.
2. L. H. Ai, C. Y. Zhang and Z. L. Chen, *J. Hazard. Mater.* 2011, **192**, 1515-1524.
3. J. Ma, F. Yu, L. Zhou, L. Jin, M. X. Yang, J. S. Luan, Y. H. Tang, H. B. Fan, Z. W. Yuan and J. H. Chen, *ACS Appl. Mater. Inter.* 2012, **4**, 5749-5760.
4. Y. Q. Wang , G. Z. Wang , H. Q. Wang , W. P. Cai and L. D. Zhang, *Chem.*

*Commun.*, 2008, 6555-6557

5. J. Qu, W. Li, C. Y. Cao, X. J. Yin, L. Zhao, J. Bai, Z. Qin and W. G. Song, *J. Mater. Chem.*, 2012, **22**, 17222.
6. J. H. Huang, K. L., Huang, S. Q., Liu, A. T., Wang, C. Yan, *Colloids Surf. A* 2008, **330**, 55-61.
7. H. Chen,; J. Zhao,; J. Y. Wu,; G. L. Dai, *J. Hazard. Mater.* 2011, **192**, 246-254.
8. (39) H. Y. Zhu,; R. Jiang,; L. Xiao,; G. M. Zeng, *Bioresour. Technol.* 2010, **101**, 5063-5069.
9. W. Ma, X. Y. Song, Y. Q. Pan, Z. H. Cheng, G. Xin, B. D. Wang, X. G. Wang, *Chem. Eng. J.*, 2012, **193**, 381-390.
10. A. Saeeda, M. Sharifb, M. Iqbala, *J. Hazard. Mater.*, 2010, **179**, 564-572.
- 11 K. P. Singh, S. Gupta, A. K. Singh, S. Sinha, *J. Hazard. Mater.*, 2011, **186**, 1462-1473.
12. S. Senthilkumaar, P. Kalaamani, C.V. Subburaam, *J. Hazard. Mater.*, 2006, **136**, 800-808.
